# Supplementary material
Source: PubMed Central journal article supplement (PMC8332194)
Supplement: mmc1.pdf [file mmc1.pdf]

# THE LANCET Microbe

## Supplementary appendix

This appendix formed part of the original submission and has been peer reviewed. We post it as supplied by the authors.

Supplement to: Russell CD, Fairfield CJ, Drake TM, et al. Co-infections, secondary infections, and antimicrobial use in patients hospitalised with COVID-19 during the first pandemic wave from the ISARIC WHO CCP-UK study: a multicentre, prospective cohort study. *Lancet Microbe* 2021; published online June 2. [https://doi.org/10.1016/S2666-5247\(21\)00090-2](https://doi.org/10.1016/S2666-5247(21)00090-2).

## Supplementary Materials

**Supplementary Table 1: Vital signs, laboratory results and thoracic radiology**

| Variable                                                       | Value             |
|----------------------------------------------------------------|-------------------|
| <b>Vital signs<sup>1</sup></b>                                 |                   |
| Temperature, °C, mean (SD)                                     | 37.4 (1.1)        |
| Respiratory rate, breaths/min, median (IQR)                    | 21.0 (18.0–26.0)  |
| Systolic blood pressure, mmHg, mean (SD)                       | 131.2 (25.4)      |
| Heart rate, beats/min, mean (SD)                               | 92.4 (21.9)       |
| Oxygen saturation, %, median (IQR)                             | 95.0 (92.0–97.0)  |
| <b>Laboratory results<sup>1</sup></b>                          |                   |
| Total white cell count, x10 <sup>9</sup> /L, median (IQR)      | 7.3 (5.3–10.3)    |
| Neutrophil count, x10 <sup>9</sup> /L, median (IQR)            | 5.6 (3.8–8.4)     |
| Lymphocyte count, x10 <sup>9</sup> /L, median (IQR)            | 0.9 (0.6–1.3)     |
| Platelet count, x10 <sup>9</sup> /L, mean (SD)                 | 236.4 (112.4)     |
| C-reactive protein, mg/L, median (IQR)                         | 83.0 (35.0–157.0) |
| Procalcitonin, ng/mL, median (IQR)                             | 0.3 (0.1–1.1)     |
| <b>Thoracic radiology</b>                                      |                   |
| Thoracic imaging performed on admission <sup>2</sup> (n=47303) | 34355 (72.6)      |
| Infiltrates present on admission (n=31947)                     | 11831 (37.0)      |

Numbers are N (%) unless otherwise stated.

<sup>1</sup>Recorded on admission.

<sup>2</sup>X-ray or CT.

**Supplementary Table 2: Results of microbiological investigations**

| Sample type                                          | N (%)             |
|------------------------------------------------------|-------------------|
| <b>Blood cultures<sup>1</sup></b> (n=6157 recorded)  |                   |
| Negative/contaminant                                 | 5461 (88.7)       |
| Positive microscopy only                             | 196 (3.2)         |
| <b>Significant positive<sup>5</sup></b>              | <b>500 (8.1)</b>  |
| <b>Sputum</b> (n=1429 recorded)                      |                   |
| Negative/contaminant                                 | 781 (54.7)        |
| Positive microscopy only                             | 46 (3.2)          |
| <b>Significant positive<sup>5</sup></b>              | <b>602 (42.1)</b> |
| <b>Deep respiratory<sup>2</sup></b> (n=402 recorded) |                   |
| Negative/contaminant                                 | 188 (46.8)        |
| Positive microscopy only                             | 7 (1.7)           |
| <b>Significant positive<sup>5</sup></b>              | <b>207 (51.5)</b> |
| <b>Urine<sup>3</sup></b> (n=2663 recorded)           |                   |
| Negative/contaminant                                 | 1656 (62.2)       |
| Positive microscopy only                             | 118 (4.4)         |
| <b>Significant positive<sup>5</sup></b>              | <b>889 (33.4)</b> |
| <b>Other<sup>4</sup></b> (n=86 recorded)             |                   |
| Negative/contaminant                                 | 38 (44.2)         |
| <b>Significant positive<sup>5</sup></b>              | <b>48 (55.8)</b>  |

<sup>1</sup>Peripheral and central.

<sup>2</sup>Endotracheal aspirates, bronchoalveolar lavage or pleural fluid.

<sup>3</sup>Urine and catheter specimens of urine.

<sup>4</sup>Other samples include abdominopelvic fluid, high vaginal swabs and miscellaneous pus samples.

<sup>5</sup>Refer to Methods section for definition of significant.

**Supplementary Table 3: Cohort characteristics stratified by recording of microbiological investigations**

| Variable                                               | Microbiological investigations recorded |                 | p-value |
|--------------------------------------------------------|-----------------------------------------|-----------------|---------|
|                                                        | No<br>(n=40,253)                        | Yes<br>(n=8649) |         |
| <b>Demographics</b>                                    |                                         |                 |         |
| Male sex                                               | 22669 (56.3)                            | 5310 (61.4)     | <0.001  |
| Age, years, mean (SD)                                  | 70.2 (17.8)                             | 68.1 (18.2)     | <0.001  |
| <b>Co-morbidities</b>                                  |                                         |                 |         |
| Chronic cardiac disease                                | 12247 (30.4)                            | 2528 (29.2)     | <0.001  |
| Hypertension                                           | 8631 (21.4)                             | 2014 (23.3)     | 0.001   |
| Chronic pulmonary disease                              | 10774 (26.8)                            | 2395 (27.7)     | <0.001  |
| Immunocompromise                                       | 5993 (14.9)                             | 1555 (18.0)     | <0.001  |
| Asthma                                                 | 5138 (12.8)                             | 1171 (13.5)     | <0.001  |
| Chronic kidney disease                                 | 6647 (16.5)                             | 1445 (16.7)     | <0.001  |
| Chronic liver disease (moderate/severe)                | 708 (1.8)                               | 159 (1.8)       | <0.001  |
| Chronic liver disease (mild)                           | 567 (1.4)                               | 116 (1.3)       | <0.001  |
| Chronic neurological disease                           | 4731 (11.8)                             | 1016 (11.7)     | <0.001  |
| Current malignancy                                     | 3761 (9.3)                              | 969 (11.2)      | <0.001  |
| Chronic haematology disease                            | 1523 (3.8)                              | 461 (5.3)       | <0.001  |
| HIV/AIDS                                               | 143 (0.4)                               | 41 (0.5)        | <0.001  |
| Obesity <sup>1</sup>                                   | 3782 (9.4)                              | 1095 (12.7)     | <0.001  |
| Diabetes mellitus                                      | 11 114 (27.7)                           | 2467 (28.5)     | <0.001  |
| Rheumatological disease                                | 4081 (10.1)                             | 984 (11.4)      | <0.001  |
| Dementia                                               | 6385 (15.9)                             | 1149 (13.3)     | <0.001  |
| <b>Smoking</b>                                         |                                         |                 |         |
| Current                                                | 1940 (4.8)                              | 407 (4.7)       | <0.001  |
| Never                                                  | 14458 (35.9)                            | 3495 (40.4)     |         |
| Former                                                 | 8678 (21.6)                             | 2147 (24.8)     |         |
| <b>Pre-admission</b>                                   |                                         |                 |         |
| Symptom onset prior to admission, days, median (IQR)   | 5.7 (6.9)                               | 6.2 (6.7)       | <0.001  |
| Receipt of antimicrobials prior to admission           | 10836 (26.9)                            | 2554 (29.5)     | <0.001  |
| <b>Organ support</b>                                   |                                         |                 |         |
| Non-invasive ventilation                               | 4937 (12.3)                             | 1818 (21.0)     | <0.001  |
| Invasive mechanical ventilation                        | 2547 (6.3)                              | 1694 (19.6)     | <0.001  |
| Renal replacement therapy                              | 912 (2.3)                               | 596 (6.9)       | <0.001  |
| Vasopressors                                           | 1663 (4.1)                              | 1324 (15.3)     | <0.001  |
| <b>Medical management</b>                              |                                         |                 |         |
| Anti-bacterial                                         | 31415 (78.0)                            | 7843 (90.7)     | <0.001  |
| Anti-fungal                                            | 221 (0.5)                               | 88 (1.0)        | <0.001  |
| Corticosteroids                                        | 3705 (9.2)                              | 1145 (13.2)     | <0.001  |
| <b>Outcomes</b>                                        |                                         |                 |         |
| Outcome at ≥28 days                                    |                                         |                 |         |
| Discharged alive                                       | 24062 (59.8)                            | 4757 (55.0)     | <0.001  |
| Ongoing hospitalisation                                | 893 (2.2)                               | 293 (3.4)       |         |
| Transfer to other facility                             | 2099 (5.2)                              | 524 (6.1)       |         |
| Inpatient death                                        | 12474 (31.0)                            | 2918 (33.7)     |         |
| Palliative discharge                                   | 721 (1.8)                               | 148 (1.7)       |         |
| Unknown/Awaited                                        | 4 (0.0)                                 | 9 (0.1)         |         |
| Length of stay, days, mean (SD)                        | 12.8 (14.3)                             | 15.8 (15.8)     | <0.001  |
| <b>Vital signs on admission</b>                        |                                         |                 |         |
| Temperature, °C, mean (SD)                             | 37.3 (1.1)                              | 37.6 (1.1)      | <0.001  |
| Respiratory rate, breaths/min, mean (SD)               | 23.0 (7.0)                              | 24.5 (7.9)      | <0.001  |
| Systolic blood pressure, mmHg, mean (SD)               | 131.4 (25.5)                            | 131.0 (25.5)    | 0.178   |
| Heart rate, beats/min, mean (SD)                       | 91.7 (21.8)                             | 94.6 (21.9)     | <0.001  |
| Oxygen saturation, %, mean (SD)                        | 93.5 (7.7)                              | 92.8 (7.8)      | <0.001  |
| <b>Laboratory results on admission</b>                 |                                         |                 |         |
| Total white cell count, x10 <sup>9</sup> /L, mean (SD) | 8.8 (7.0)                               | 9.1 (7.1)       | 0.001   |
| Neutrophil count, x10 <sup>9</sup> /L, mean (SD)       | 7.0 (6.7)                               | 7.1 (5.6)       | 0.053   |
| Lymphocyte count, x10 <sup>9</sup> /L, mean (SD)       | 1.5 (5.7)                               | 1.6 (7.0)       | 0.193   |
| Platelet count, x10 <sup>9</sup> /L, mean (SD)         | 237.6 (112.1)                           | 234.8 (113.5)   | 0.039   |
| C-reactive protein, mg/L, mean (SD)                    | 105.9 (94.5)                            | 123.4 (105.7)   | <0.001  |
| Procalcitonin, ng/mL, mean (SD)                        | 2.8 (10.0)                              | 3.3 (10.9)      | 0.104   |
| <b>Thoracic radiology on admission</b>                 |                                         |                 |         |
| Thoracic imaging performed on admission                | 27723 (68.9)                            | 6632 (76.7)     | <0.001  |
| Infiltrates present on admission                       | 15795 (39.2)                            | 4321 (50.0)     | <0.001  |

SD, standard deviation; IQR, interquartile range

<sup>1</sup>Clinician defined.

**Supplementary Table 4: Deep respiratory microbiology results stratified by sample type**

| Organism                            | BAL<br>(n=155) | ETA<br>(n=141) | Other<br>(n=32) |
|-------------------------------------|----------------|----------------|-----------------|
| <i>Achromobacter xylosoxidans</i>   | 1 (0.6)        | 0              | 0               |
| <i>Acinetobacter baumannii</i>      | 0              | 4 (2.8)        | 1 (3.1)         |
| Anginosus group streptococci        | 0              | 0              | 3 (9.4)         |
| <i>Aspergillus fumigatus</i>        | 3 (1.9)        | 4 (2.8)        | 0               |
| <i>Bacteroides fragilis</i>         | 0              | 0              | 1 (3.1)         |
| <i>Citrobacter</i> sp.              | 1 (0.6)        | 0              | 1 (3.1)         |
| <i>Citrobacter freundii</i>         | 3 (1.9)        | 0              | 0               |
| <i>Citrobacter koseri</i>           | 11 (7.1)       | 11 (7.8)       | 1 (3.1)         |
| <i>Enterobacter</i> sp.             | 1 (0.6)        | 1 (0.7)        | 0               |
| <i>Enterobacter cloacae</i>         | 8 (5.2)        | 8 (5.7)        | 0               |
| <i>Enterobacter kobei</i>           | 1 (0.6)        | 0              | 0               |
| <i>Enterococcus</i> sp.             | 2 (1.3)        | 0              | 0               |
| <i>Enterococcus faecalis</i>        | 3 (1.9)        | 1 (0.7)        | 1 (3.1)         |
| <i>Enterococcus faecium</i>         | 2 (1.3)        | 1 (0.7)        | 3 (9.4)         |
| <i>Escherichia coli</i>             | 17 (11)        | 21 (14.9)      | 5 (15.6)        |
| <i>Haemophilus</i> sp.              | 1 (0.6)        | 0              | 0               |
| <i>Haemophilus influenzae</i>       | 3 (1.9)        | 1 (0.7)        | 1 (3.1)         |
| <i>Hafnia alvei</i>                 | 1 (0.6)        | 0              | 0               |
| <i>Klebsiella</i> sp.               | 4 (2.6)        | 0              | 1 (3.1)         |
| <i>Klebsiella aerogenes</i>         | 17 (11)        | 10 (7.1)       | 1 (3.1)         |
| <i>Klebsiella oxytoca</i>           | 4 (2.6)        | 2 (1.4)        | 0               |
| <i>Klebsiella pneumoniae</i>        | 15 (9.7)       | 17 (12.1)      | 1 (3.1)         |
| <i>Klebsiella variicola</i>         | 1 (0.6)        | 0              | 0               |
| <i>Lactobacillus rhamnosus</i>      | 0              | 0              | 1 (3.1)         |
| <i>Moraxella catarrhalis</i>        | 1 (0.6)        | 0              | 0               |
| <i>Morganella morganii</i>          | 3 (1.9)        | 6 (4.3)        | 0               |
| <i>Proteus mirabilis</i>            | 5 (3.2)        | 6 (4.3)        | 0               |
| <i>Pseudomonas</i> sp.              | 2 (1.3)        | 1 (0.7)        | 1 (3.1)         |
| <i>Pseudomonas aeruginosa</i>       | 14 (9)         | 11 (7.8)       | 2 (6.2)         |
| <i>Serratia</i> sp.                 | 0              | 1 (0.7)        | 0               |
| <i>Serratia marcescens</i>          | 4 (2.6)        | 5 (3.5)        | 0               |
| <i>Serratia ureilytica</i>          | 1 (0.6)        | 0              | 0               |
| <i>Staphylococcus aureus</i>        | 17 (11)        | 22 (15.6)      | 4 (12.5)        |
| <i>Stenotrophomonas maltophilia</i> | 4 (2.6)        | 4 (2.8)        | 1 (3.1)         |
| Streptococcus (Beta-haemolytic)     | 0              | 1 (0.7)        | 0               |
| <i>Streptococcus agalactiae</i>     | 1 (0.6)        | 2 (1.4)        | 0               |
| <i>Streptococcus anginosus</i>      | 0              | 0              | 1 (3.1)         |
| <i>Streptococcus intermedius</i>    | 0              | 0              | 1 (3.1)         |
| <i>Streptococcus pneumoniae</i>     | 2 (1.3)        | 0              | 0               |
| <i>Streptococcus pyogenes</i>       | 2 (1.3)        | 1 (0.7)        | 1 (3.1)         |

Data are n (%) for each sample type.

BAL: bronchoalveolar lavage, ETA: endotracheal aspirate.

Other included pleural fluid and other samples labelled “deep”.

**Supplementary Table 5: Geographical variation in antimicrobial usage**

| Region                 | Ward-level  |             |             | Critical care |            |            |
|------------------------|-------------|-------------|-------------|---------------|------------|------------|
|                        | March       | April       | May         | March         | April      | May        |
| East of England        | 1050 (84.8) | 1847 (86.2) | 361 (79.2)  | 284 (90.0)    | 299 (89.2) | 35 (92.1)  |
| London                 | 1657 (80.7) | 1403 (82.6) | 89 (73.1)   | 593 (91.9)    | 451 (93.0) | 32 (82.1)  |
| Midlands               | 2698 (79.9) | 3620 (81.9) | 842 (74.6)  | 453 (86.5)    | 522 (88.8) | 103 (80.5) |
| North East & Yorkshire | 1069 (79.4) | 2612 (79.8) | 524 (73.9)  | 253 (93.4)    | 387 (86.4) | 51 (82.3)  |
| North West             | 1755 (86.0) | 3625 (86.5) | 768 (78.7)  | 312 (93.4)    | 536 (93.7) | 74 (90.2)  |
| South East             | 1403 (79.9) | 2186 (83.9) | 4977 (78.0) | 407 (91.8)    | 498 (95.4) | 75 (94.2)  |
| South West             | 679 (82.8)  | 1030 (79.4) | 200 (63.9)  | 154 (94.5)    | 182 (97.8) | 24 (92.3)  |
| Scotland               | 354 (72.7)  | 763 (74.4)  | 112 (64.4)  | 150 (87.2)    | 183 (84.3) | 12 (66.7)  |
| Wales                  | 344 (75.1)  | 337 (79.1)  | 64 (83.1)   | 74 (88.1)     | 99 (90.0)  | 13 (100.0) |

Data are n (%).

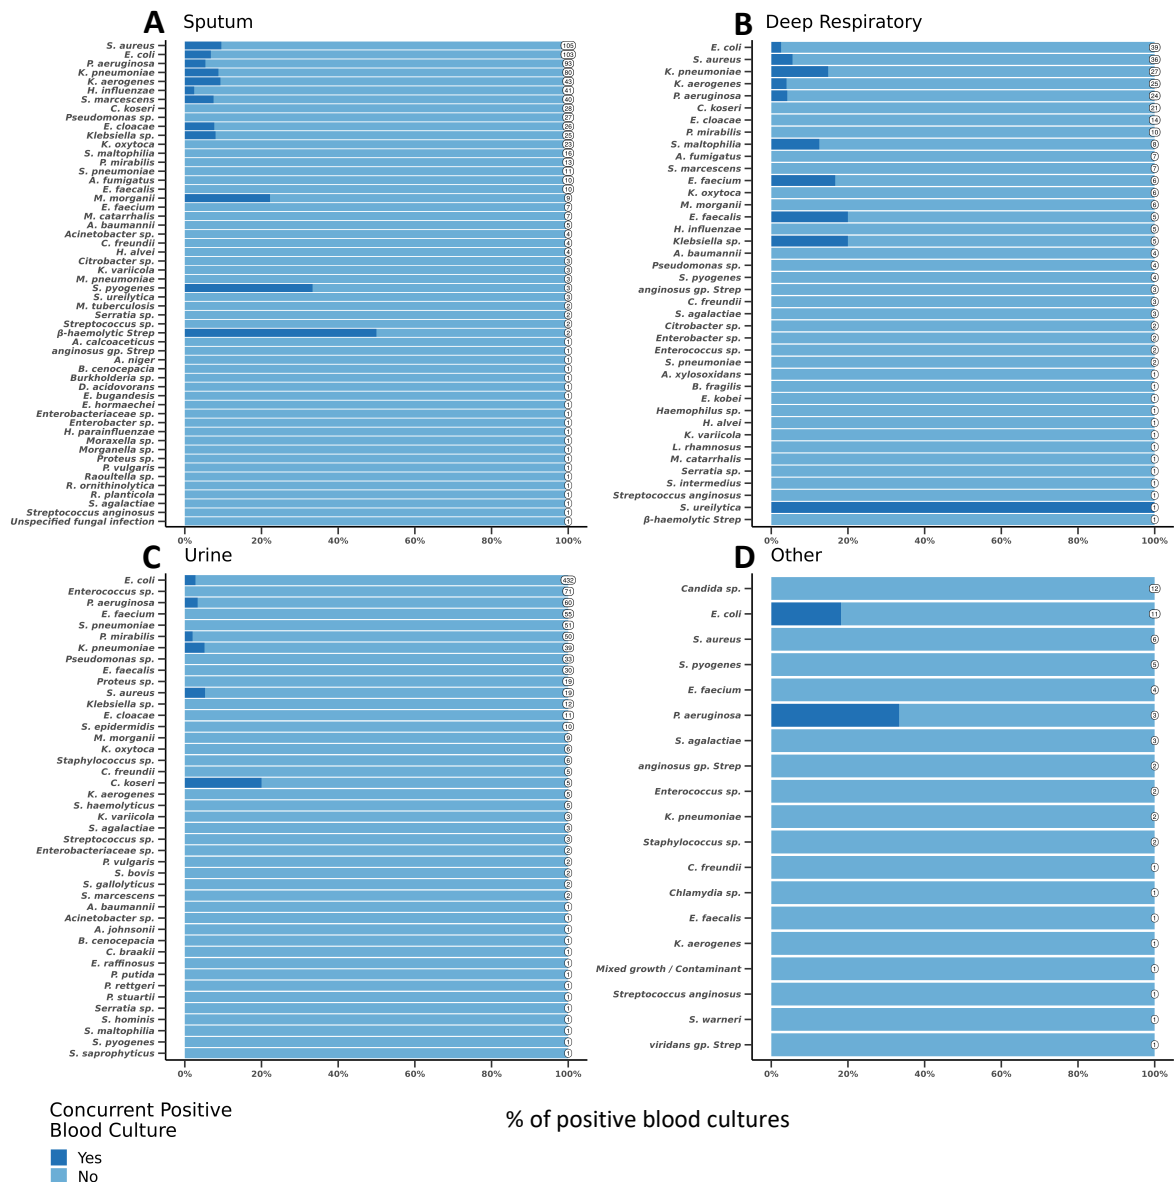

**Supplementary Figure 1. Co-detection of pathogens in blood cultures and other sample types**

For patients with positive blood cultures, the percentage of instances in which the same pathogen was detected in (A) sputum, (B) deep respiratory, (C) urine or (D) other samples is shown. Deep respiratory samples are endotracheal aspirates, bronchoalveolar lavage and pleural fluid. Other samples include abdominopelvic fluid, high vaginal swabs and miscellaneous pus samples. Number at end of bar is the number of times the organism was detected in the listed sample type.

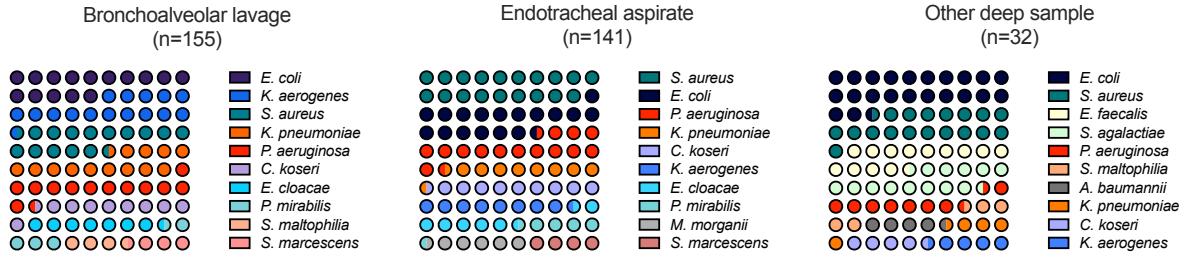

**Supplementary Figure 2. Deep respiratory microbiology results stratified by sample type**

The 10 most frequently identified organisms from each sample type is shown. The cells in the waffle chart are shaded to represent the total percentage of organisms from that sample type each organism accounts for.

## A Critical care

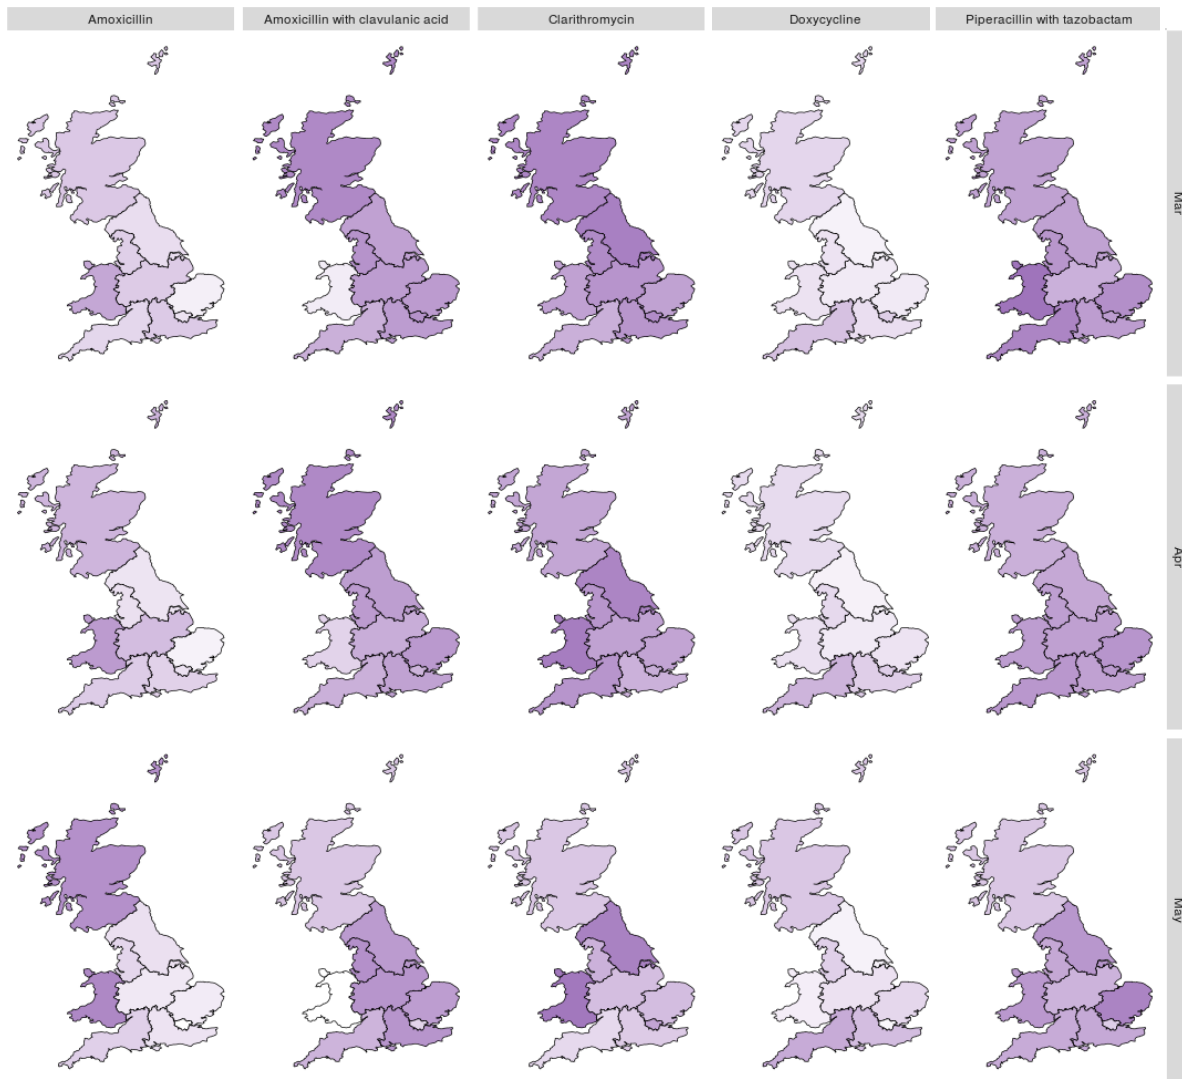

0 25 50 75 100  
(Legend overleaf)

## B Ward-level care

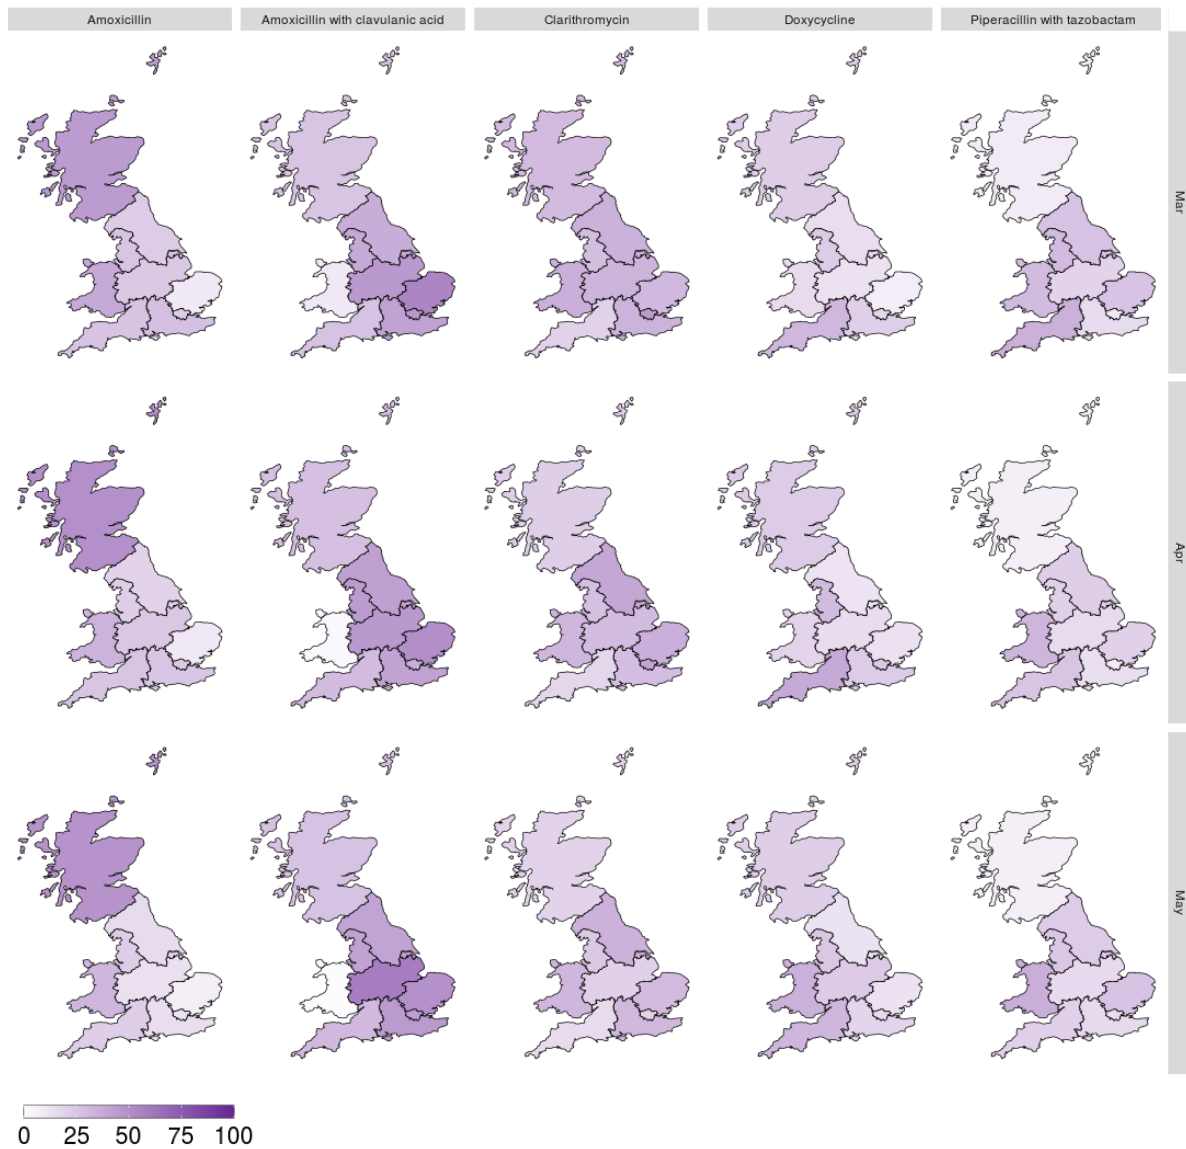

### Supplementary Figure 3: Geographical variation in usage of individual antimicrobials over time

Map is divided into Scotland, Wales and regions of England (North East & Yorkshire, North West, Midlands, East, South East, South West, London). Purple shading of regions represents the percentage of patients who received the named antimicrobial during their hospital admission stratified by month of admission (March, April and May). (A) shows patients in critical care and (B) shows patients receiving ward-level care.



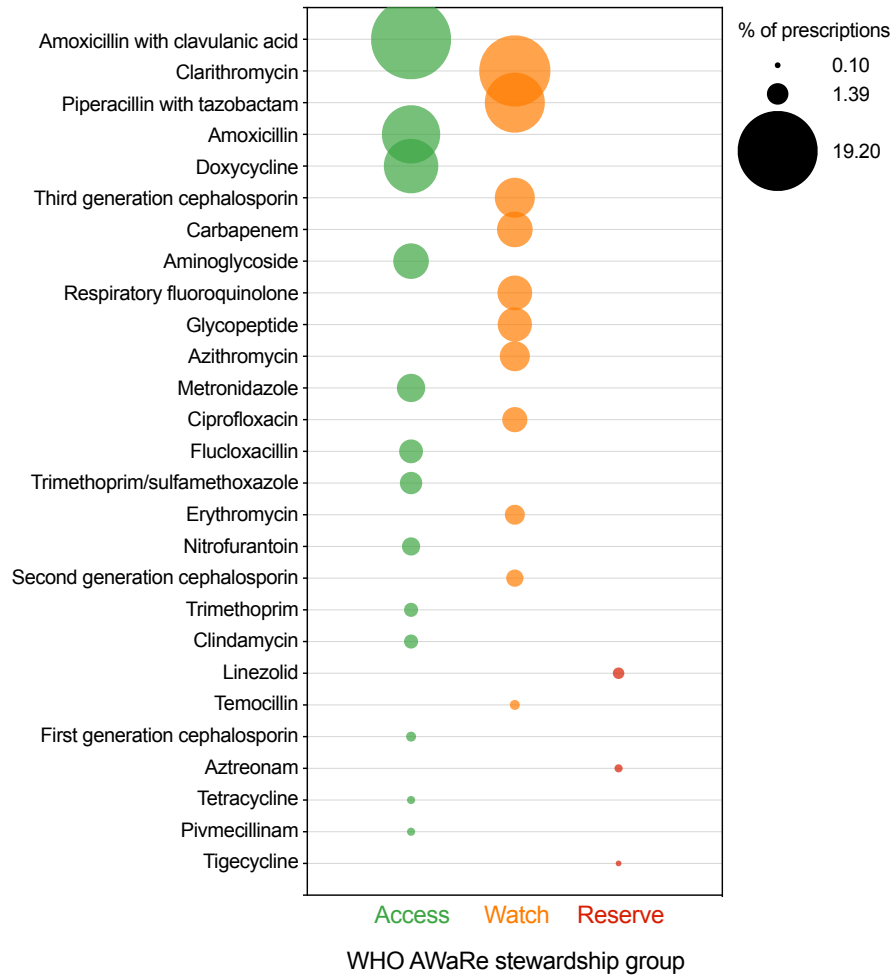

**Supplementary Figure 4: Antimicrobial prescriptions classified according to WHO AWaRe classification**  
 The size of each bubble is proportional to the percentage of total prescriptions each antimicrobial accounts for (key to size shown with black bubbles). Bubble are coloured by WHO AWaRe stewardship group (green: “access”; orange: “watch”; red: “reserve”). 50.6% of prescriptions are of “access” antimicrobials, 48.7% are “watch” and 0.7% are “reserve”.
